## **Distinct neuronal subtypes of the lateral habenula differentially target ventral tegmental area dopamine neurons**

Michael L. Wallace<sup>1</sup>, Kee Wui Huang<sup>1</sup>, Daniel Hochbaum<sup>1</sup>, Minsuk Hyun<sup>1</sup>, Gianna Radeljic<sup>1</sup>, and Bernardo L. Sabatini<sup>1</sup>

<sup>1</sup> Howard Hughes Medical Institute, Department of Neurobiology, Harvard Medical School, Boston, MA 02115, USA.

Correspondence: [bsabatini@hms.harvard.edu](mailto:bsabatini@hms.harvard.edu)

## 1 **ABSTRACT**

2 The lateral habenula (LHb) is an epithalamic brain structure critical for processing and  
3 adapting to negative action outcomes. However, despite the importance of LHb to  
4 behavior and the clear anatomical and molecular diversity of LHb neurons, the neuron  
5 types of the habenula remain unknown. Here we use high-throughput single-cell  
6 transcriptional profiling, monosynaptic retrograde tracing, and multiplexed FISH to  
7 characterize the cells of the mouse habenula. We find 5 subtypes of neurons in the  
8 medial habenula (MHb) that are organized into anatomical subregions. In the LHb we  
9 describe 4 neuronal subtypes and show that they differentially target dopaminergic and  
10 GABAergic cells in the ventral tegmental area (VTA). These data provide a valuable  
11 resource for future study of habenular function and dysfunction and demonstrate  
12 neuronal subtype specificity in the LHb-VTA circuit.

13

## 14 **INTRODUCTION**

15 The habenula is an epithalamic structure divided into medial (MHb) and lateral  
16 (LHb) subregions that receives diverse input from the basal ganglia, frontal cortex, basal  
17 forebrain, hypothalamus and other regions involved in processing both sensory  
18 information and internal state (Herkenham and Nauta, 1977; Yetnikoff et al., 2015).  
19 Two main targets of the LHb output are major monoaminergic structures in the brain,  
20 the ventral tegmental area (VTA) and raphe nuclei (dorsal (DRN) and medial (MRN)),  
21 whereas the MHb targets the interpeduncular nucleus (Herkenham and Nauta, 1979).  
22 Due to its dual effects on dopamine and serotonin producing neurons, LHb has been  
23 proposed to contribute to the neurobiological underpinnings of depression and addiction  
24 (Li et al., 2011, 2013; Maroteaux and Mamelì, 2012; Meye et al., 2016). Furthermore,  
25 the LHb has been implicated in a wide range of functions and behaviors including  
26 reward prediction error, aversion, cognition, and adaptive decision making (Hikosaka,  
27 2010; Matsumoto and Hikosaka, 2007; Mizumori and Baker, 2017; Proulx et al., 2014;  
28 Tian and Uchida, 2015; Wang et al., 2017).

29 The effects of LHb on each downstream structure and its contribution to different  
30 behaviors are likely carried out by distinct populations of neurons. In addition, the LHb  
31 may, at the macroscopic level, consist of distinct sub-domains with differential

32 contributions to limbic and motor functions (Zahm and Root, 2017). Further, many  
33 studies suggest that habenular neurons show differences in gene expression across  
34 hemispheres (Concha and Wilson, 2001; Pandey et al., 2018), projection targets (Quina  
35 et al., 2014, 2015), and anatomical location (Gonçalves et al., 2012). Nevertheless, the  
36 systematic relationship between molecular profiles, projections patterns, and anatomical  
37 organization of neurons in the LHb is unknown.

38 Here we provide a comprehensive description of the neuronal subtypes in the  
39 LHb based on single-cell transcriptional profiling, multiplexed fluorescent *in situ*  
40 hybridization (FISH), and cell type specific monosynaptic retrograde tracing.  
41 Furthermore, as the MHb was included in our dissections, we also provide a molecular  
42 description of this nucleus. We find that the MHb has five, and LHb has four,  
43 transcriptionally-defined neuronal subtypes. Interestingly, the HbX subtype, which lies  
44 at the border between the MHb and LHb, is more transcriptionally similar to other LHb  
45 subtypes than MHb subtypes. We find that the four LHb neuronal subtypes are distinct  
46 and monosynaptic retrograde tracing revealed that they differentially target the  
47 dopaminergic and GABAergic neurons of the VTA. Furthermore, we find the LHb is  
48 organized into subregions defined by these transcriptionally discriminable neuronal  
49 subtypes. Together we identify previously unknown neuronal heterogeneity in the  
50 habenula and reveal that different neuronal classes have target biases in the VTA.

51

## 52 **RESULTS**

### 53 **Cell type composition of the habenula by transcriptomic profiling**

54 To examine cellular heterogeneity in the habenula, we performed high-throughput  
55 single-cell transcriptional profiling (“InDrop”) (Klein et al., 2015). Cell suspensions from  
56 the habenula were generated from acute, microdissected brain slices from adult mice  
57 (Figure 1A), producing 25,289 single-cell transcriptomes (SCTs). Excluding SCTs with  
58 <200 genes, 500 UMIs, or >10% mitochondrial genes resulted in 7,506 SCTs that were  
59 further analyzed. This subset had median counts of 2593 UMIs (min = 501, max =  
60 17787, IQR = 3986) and 349 genes (min = 302, max = 5276, IQR = 1733) per cell  
61 (Figure S1C). Subsequent analysis of gene expression patterns by principal  
62 components (PC) analysis and shared-nearest-neighbors (Satija et al., 2015) resulted in

63 12 cellular clusters (Figure 1B, see Materials and Methods for details on sequential  
64 clustering). Major cell classes (i.e. neurons, astrocytes, microglia, etc...) within these  
65 clusters were identified by expression of cell-type specific gene combinations that were  
66 extensive cross-referenced with published datasets (Saunders et al., 2018; Zeisel et al.,  
67 2018) (Figure 1B-C). In contrast to other species (Pandey et al., 2018), no major  
68 transcriptional differences were observed (Figure S1A-B) across left and right  
69 hemispheres; therefore, cells from both hemispheres were pooled for analysis. The  
70 majority of the cells in the dataset were neurons (53%) and we focused our analysis on  
71 these clusters for the remainder of the study.

72       Neurons ( $n = 3,930$  cells), identified by expression of genes required for chemical  
73 synaptic transmission such as *Snap25*, *Syp*, and *Syt4*, clustered into 2 main classes  
74 (Figure 1B-C). We examined if these 2 neuronal clusters could be spatially  
75 distinguished using digital *in situ* hybridization (ISH) analysis (Allen Brain Atlas, (Lein et  
76 al., 2007)) of differentially expressed genes (Finak et al., 2015). The larger cluster of  
77 neurons ( $n = 3,370$  cells) expressed *Tac2* and corresponds to the MHb (Figure 2),  
78 whereas the smaller cluster ( $n = 560$  cells) expressed *Gap43* and corresponds to the  
79 LHb (Figure 3).

80

## 81 **Differential gene expression reveals the spatial organization of MHb neuron** 82 **subtypes**

83 Analysis of MHb neurons revealed that they could be divided into 8 clusters (Figure  
84 S2A). However, 3 clusters were clearly distinguished by high expression of activity-  
85 dependent genes (ADGs) (Figure S2B), suggesting that they might simply reflect  
86 neurons of other clusters that had been recently strongly activated. Indeed, regressing  
87 out the PC containing a large number of ADGs (Figure S2E-F) caused these 3 high  
88 ADGs clusters to merge with other MHb clusters (Figure S2C-D), leaving 5 distinct  
89 subtypes of MHb neurons.

90       We constructed a cluster dendrogram using the averaged cluster gene  
91 expression to examine the transcriptional differences between these subtypes (Figure  
92 2D). In general, subtypes of MHb neurons were divided by genes that were involved in  
93 the synthesis and packaging of different neurotransmitters and neuropeptides. All MHb

94 neurons expressed high levels of *Slc17a6* and *Slc17a7*, the genes encoding vesicular  
95 glutamate transporters 1 and 2, and *Tac2* suggesting that all MHb neurons are  
96 glutamatergic and produce the neuropeptide Neurokinin B (Figure 2D, S4A). Two of the  
97 five clusters also expressed *Slc18a3* and *Chat* (not shown), the vesicular transporter  
98 and biosynthetic enzyme for acetylcholine, respectively, indicating that these neurons  
99 may co-release glutamate and acetylcholine (Figure S4A), as has been described in  
100 several studies (Ren et al., 2011; Soria-Gómez et al., 2015). Interestingly, no MHb  
101 neurons expressed significant levels of the canonical GABA handling genes *Slc32a1*,  
102 *Gad1*, or *Slc18a2* (although *Gad2* was expressed at low levels in all subtypes);  
103 therefore, they are unlikely to release GABA.

104 To examine the spatial distribution of MHb neuron subtypes we cross referenced  
105 their differentially expressed genes (DEGs) with the Allen Mouse Brain Atlas of ISH  
106 hybridization data (Table 3) (Lein et al., 2007). Generally, we found that individual  
107 DEGs for particular MHb subtypes consistently mapped onto discrete regions in the  
108 MHb (Figure 2C, S3). Also, DEGs for MHb neurons were rarely DEGs for LHb neurons  
109 (Figure S4A). This permitted classification of transcriptionally defined MHb subtypes to  
110 particular subregions of MHb (Figure 2D, S7). MHb neurons divided along the  
111 dorsal/ventral axis with a third lateral (enriched for genes *Sema3d*, *Calb1*, and *Spon1*)  
112 subtype (Figure 2C-D, S3C-E). Ventral groups could be further subdivided into two  
113 distinct subtypes, the “ventral two thirds” of the MHb (enriched for *Lmo3*) and the  
114 “ventrolateral” MHb (enriched for genes *Esam* and *Slc18a3*). Gene expression patterns  
115 indicated that it is possible that neurons from these two subtypes were partially  
116 intermingled and did not form a defined border (Figure 2C, S3A-B). The rest of the MHb  
117 could be subdivided into the “dorsal” (enriched for genes *Col16a1*, *Wif1*, and *Adcyap1*)  
118 and “superior” (enriched for genes *Cck* and *Avil*) subtypes. These two groups split along  
119 a medial/lateral axis with the “dorsal” being more laterally located than the “superior”  
120 (Figure 2C-D, S3F-I) (Wagner et al., 2016, 2014).

121

## 122 **Genetic distinction of four LHb neuron subtypes**

123 *Gap43* is highly expressed in the LHb and along with several other genes (*Htr2c*,  
124 *Pcdh10*, *Gabra1*, and *Syn2*) distinguishes neurons of this region from those of

125 neighboring MHb (Figure 3A-B, S4A). Unlike for MHb neurons, we did not detect  
126 significant elevation of ADGs in LHb neurons. We found 4 distinct clusters of neurons in  
127 LHb which, again unlike MHb, did not have distinct expression profiles of genes  
128 involved in the synthesis and packaging of different typical fast neurotransmitters (e.g.  
129 glutamate, GABA, acetylcholine) – all LHb neurons expressed high levels of *Slc17a6*  
130 and very low levels of *Slc32a1*, suggesting that they are glutamatergic.

131 Subdivisions of the lateral habenula based on topographic, morphological and  
132 cytochemical criteria have been described in rat (Andres et al., 1999) and mouse  
133 (Wagner et al., 2016, 2014) and are used here to describe the patterns of DEGs  
134 extracted from our single-cell dataset (see terms in quotes below). We examined the  
135 spatial distribution of LHb neuron subtypes by cross referencing their differentially  
136 expressed genes (DEGs) with the Allen Mouse Brain Atlas of ISH data (Lein et al.,  
137 2007). We found that DEGs showed 4 distinct, but consistent patterns that aligned with  
138 their subclusters (Figure 3C-D, S8). These consisted of 1) a cluster that showed high  
139 expression of DEGs in both the “lateral oval” and “central medial” subdivision, we  
140 named this the *oval/medial* subdivision; 2) a cluster that showed high expression of  
141 DEGs in the “marginal subdivision of the medial division of the LHb”, we called this the  
142 *marginal* subdivision; 3) a cluster that showed high expression of DEGs in the “lateral”  
143 subdivision (but avoiding expression in the “lateral oval”), we also called this the *lateral*  
144 subdivision; and 4) a cluster that showed high expression of DEGs in the subdivision  
145 defined as “HbX” lying on the dorsal border between MHb and LHb, we also refer to this  
146 as the *HbX* subdivision (Figure 3C) (Wagner et al., 2016, 2014). Interestingly, the *HbX*  
147 region is more closely related in its gene expression to other LHb clusters than to any  
148 clusters in the MHb; therefore it is more similar to LHb neurons than previously  
149 recognized (Figure 3D) (Wagner et al., 2016).

150 We performed multiplexed FISH to confirm that the 4 transcriptionally-defined  
151 clusters of LHb neurons were distinct and anatomically organized within the LHb. We  
152 chose 4 highly expressed DEGs (*Chrm3*, *Vgf*, *Gpr151*, and *Sst*) and examined gene  
153 expression levels in individual neurons (Figure 4). As predicted by the single cell  
154 sequencing, the chosen genes generally expressed in different cells, confirming that  
155 they defined molecularly distinct neuronal subtypes (Figure 4). An exception to this

156 general rule, but consistent with the predictions of single cell sequencing, individual  
157 neurons in the HbX expressed both *Sst* and *Gpr151* (Figure 4D). Additionally, when  
158 strongly expressed, *Chrm3* and *Vgf* were found in different cells, but they were  
159 occasionally co-expressed in neurons that had relatively low levels of both genes  
160 (Figure 4A).

161 The chosen genes are largely expressed in non-overlapping patterns at the  
162 macroscopic level, confirming the organization of LHb into molecularly-defined  
163 subregions (Figure 4, S7). Nevertheless, cells from a subtype did intermingle with cells  
164 of another group and sharply defined borders between LHb subregions were not  
165 observed (e.g. Figure 4C). Therefore, diagrams of gene expression (Figure 4) illustrate  
166 where gene expression is greatest or where cells expressing the gene are most  
167 numerous and not that gene expression is perfectly restricted to a particular subregion.

168

### 169 **LHb neuron subtypes differentially target VTA GABAergic and dopaminergic** 170 **neurons**

171 The LHb projects via the fasciculus retroflexus to the ventral tegmental area (VTA),  
172 rostromedial tegmental area (RMTg), and median/dorsal raphe (Herkenham and Nauta,  
173 1977). The VTA consists of a large and diverse population of dopamine neurons, as  
174 well as smaller populations of purely GABAergic, purely glutamatergic, and  
175 GABA/glutamate coreleasing neurons. Both GABAergic and dopaminergic VTA neurons  
176 receive input from the LHb (Beier et al., 2015; Lammel et al., 2012; Morales and  
177 Margolis, 2017; Watabe-Uchida et al., 2012) but it is unknown if these arise from  
178 molecularly distinct LHb neurons. We tested if there was connectivity specificity  
179 between LHb and VTA neuronal subtypes using rabies virus based monosynaptic  
180 retrograde tracing (Wickersham et al., 2007). To examine LHb input to VTA GABAergic  
181 neurons we injected Cre-dependent TVA-mCherry into the VTA of a VGAT-IRES-Cre  
182 mouse to restrict initial rabies virus infection to GABAergic neurons. We also coinjected  
183 a Cre-dependent AAV encoding the rabies glycoprotein (RVG) to allow for retrograde  
184 monosynaptic transfer of G-deleted, pseudotyped, rabies virus (EnvA-RbV-GFP). As  
185 only neurons with Cre will express RVG, GFP-labeled neurons in other regions are  
186 putatively presynaptic to GFP+/RVG+ VTA neurons (see Figure S6E for controls for



187 specificity of EnvA-RbV-GFP infection). FISH in the VTA revealed that ~30% of “starter  
188 cells” (neurons that were GFP+ and Cre+), coexpressed *Slc17a6* indicating they are  
189 likely GABA/glutamate coreleasing neurons (Figure S6C) (Root et al., 2014). The  
190 majority of the remaining 70% of “starter cells” are purely GABAergic (Figure S6C-D).

191 Using FISH we found retrogradely labeled neurons, marked by expression of  
192 *RbV-N* mRNA, in all four LHb subtypes (identified using enriched genes *Chrm3*, *Vgf*,  
193 *Gpr151*, and *Sst*) (Figure 5C-D, S5A). The majority of retrogradely labeled LHb  
194 neurons were found in the lateral and oval/medial subtypes in roughly equal proportions  
195 (mean±SEM: 48±0.5% *Gpr151*+ and 41±0.6% *Chrm3*+, respectively) (Figure 5D). A  
196 much smaller proportion was found in the marginal subtype (10±1% *Vgf*+), and very few  
197 HbX neurons (2±1% *Sst*+) were retrogradely labeled.

198 To examine LHb input to VTA dopaminergic neurons we performed  
199 monosynaptic retrograde tracing using the same series of viral injections in DAT-IRES-  
200 Cre mice (Figure 5A). FISH in the VTA revealed that ~91% of “starter cells” (neurons  
201 that were GFP+ and Cre+), coexpressed *Slc6a3* (dopamine transporter, DAT) indicating  
202 they are dopaminergic neurons (Figure S6D) (Morales and Margolis, 2017; Tritsch et  
203 al., 2012). The remaining 9% of starter cells express varying levels of *Slc32a1* (VGAT)  
204 indicating low levels of starter cell overlap with the experiments done in the VGAT-  
205 IRES-Cre line (Figure S6D). We performed FISH on retrogradely labeled neurons in the  
206 LHb and found that a much larger proportion of retrogradely labeled neurons in the  
207 oval/medial and marginal subtypes (61±2% *Chrm3*+ and 20±1% *Vgf*+, respectively) in  
208 the DAT-IRES-Cre than the VGAT-IRES-Cre line (Figure 5C-D, S5B). Consequently, a  
209 smaller proportion of neurons in the lateral subtype were labeled (10±0.4% *Gpr151*+) and  
210 almost no neurons in the HbX subregion were labeled (0.7±0.5% *Sst*+) (Figure 5D,  
211 S5B). Together these data suggest that both VTA GABAergic and dopaminergic  
212 neurons can receive input from all 4 subtypes of LHb neuron. However, VTA  
213 dopaminergic neurons receive the largest proportion of their LHb input from the  
214 oval/medial LHb subtype, whereas VTA GABAergic neurons receive equal levels of  
215 input from both the oval/medial and lateral LHb subtypes (Table 6).

216



217 **All LHb neuron subtypes project to the DRN in proportions similar to VTA**  
218 **dopamine neurons**

219 LHb neurons heavily innervate the dorsal and median raphe nuclei (DRN/MRN) and  
220 modulate serotonergic output throughout the brain (Zhao et al., 2015; Zhou et al., 2017).  
221 To examine the LHb subtypes that project to the DRN, we injected a non-pseudotyped  
222 rabies virus (RbV-GFP) into this area and performed FISH in the LHb for subtype  
223 enriched genes (Figure 5B-C). Similar to dopaminergic VTA neurons, the DRN  
224 received the largest proportion of its LHb input from the oval/medial subtype ( $51\pm 2\%$   
225 *Chrm3+*) (Figure 5C-D, S5C). The DRN also received minor inputs from the lateral  
226 ( $16\pm 5\%$  *Gpr151+*), marginal ( $28\pm 5\%$  *Vgf+*), and HbX ( $1\pm 0.5\%$  *Sst+*) regions (Figure 5D,  
227 S5C). Overall, the proportions of input to the DRN arising from different LHb subtypes  
228 were more similar to those to VTA dopamine neurons than those to VTA GABA neurons  
229 (Table 6).

230

231 **DISCUSSION**

232 We performed transcriptional and anatomical analyses of the habenula, a crucial circuit  
233 node that modifies brain-wide dopamine and serotonin levels through its connections to  
234 the VTA and DRN (Proulx et al., 2014; Tian and Uchida, 2015; Zhao et al., 2015).  
235 Using large-scale single cell transcriptional profiling, we classify MHb and LHb neurons  
236 into five and four major neurons types, respectively, and show that each class has a  
237 distinct gene expression pattern. The four LHb populations were confirmed to be non-  
238 overlapping at the single-cell level by FISH. Monosynaptic retrograde tracing revealed  
239 that GABAergic VTA neurons receive equal input from the oval/medial and lateral LHb  
240 neuronal subtypes, whereas dopaminergic VTA neurons receive input primarily from the  
241 oval/medial LHb subtype. Finally, neurons of the DRN receive input from the LHb in  
242 roughly similar proportions to dopaminergic VTA neurons.

243

244 **Anatomical distribution of MHb neuronal subtypes**

245 Recent studies have identified and delineated the subnuclei of the mouse MHb using  
246 morphological, topographic and cytochemical criteria (Wagner et al., 2016, 2014).  
247 Using single-cell transcriptional profiling, we show that MHb neurons can be categorized

248 into subtypes based on differential gene expression. Furthermore, the spatial  
249 distribution of these transcripts allowed us to ascribe an anatomical location to each  
250 subtype. The anatomical location of these subtypes largely agree with previously  
251 defined MHb subnuclei and we have used the same nomenclature when possible  
252 (Figure S7) (Wagner et al., 2016).

253 The two ventral subtypes of the MHb coexpressed transcripts for glutamate and  
254 ACh neurotransmission (Figure S4). Our data suggest these two ventral subtypes can  
255 be differentially targeted with intersectional approaches, as genes such as *Lmo3* and  
256 *Esam* are preferentially expressed in one subtype (Figure 2D, S4). Previous studies  
257 indicate that MHb neurons that release glutamate and ACh target the medial  
258 interpeduncular nucleus (IPN) (Ren et al., 2011) and are involved in the formation of  
259 aversive memories (Soria-Gómez et al., 2015). However, whether one or both of the  
260 transcriptionally-defined subtypes are involved in this process is unknown.

261 Additionally, cholinergic transmission in MHb has also been implicated in nicotine  
262 addiction as MHb neurons not only release ACh, but express an array of nicotinic  
263 acetylcholine receptor subunits (nAChRs, such as *Chrna3* and *Chrn3*; Figure S3 and  
264 Table 4) (Fowler et al., 2011; Shih et al., 2014). Similar to its involvement in aversive  
265 memories, MHb likely plays an important role in mediating the unpleasant symptoms  
266 associated with nicotine withdrawal (Zhao-Shea et al., 2013). Our data provide a  
267 comprehensive view of all nAChR and mAChR transcripts expressed in both MHb and  
268 LHb providing a resource for the development of new therapeutic targets for the  
269 treatment of addiction (Table 4) (D'Souza, 2016; Zuo et al., 2016).

270 Few studies have examined the function of the dorsal (enriched for genes  
271 *Col16a1*, *Wif1*, and *Adcyap1*) and superior (enriched for genes *Cck*, and *Avil*) MHb.  
272 These neurons were known to express high levels of *Tac1* (the gene that produces the  
273 neuropeptide substance P), consistent with our single-cell sequencing data (Figure S3J,  
274 Table 4) and target the lateral IPN (Hsu et al., 2016). Their activation may be  
275 reinforcing (Hsu et al., 2014), but detailed analysis of their function and neurotransmitter  
276 release has not been examined.

277

## 278 **LHb neuronal subtypes**

279 We referenced recent studies on LHb subnuclei to create a map (Figure S7) of LHb  
280 based on DEGs extracted from single-cell transcriptional profiling (Wagner et al., 2016,  
281 2014). Overall, our map largely agrees with previous work and adds many key  
282 observations into the organization and cellular and molecular diversity of the LHb. In  
283 addition to providing multiple genetic handles that can be used in future studies to target  
284 LHb neuron subtypes, our study reveals the a wide range of GPCRs (such as *Htr2c*,  
285 *Htr5b*, *Sstr2*, *Gpr151*; see Table 4) expressed in LHb neurons that could be targeted for  
286 treatment of diseases known to effect LHb function such as depression, anxiety, and  
287 addiction (Lecca et al., 2014; Proulx et al., 2014). In contrast to some reports (Zhang et  
288 al., 2018), we did not find evidence of GABAergic neurons in the LHb (or MHb).  
289 Although *Gad2* and *Slc6a1*, which encode a GABA synthetic enzyme and GABA  
290 transporter, respectively, were present at low levels in all LHb clusters we did not find  
291 expression of *Slc32a1* or *Slc18a2*, which are required for vesicular loading of GABA  
292 (Table 4). This is in agreement with recently published results demonstrating that *Gad2*  
293 expression is a poor discriminator for inhibitory (GABAergic) neurons (Moffitt et al.,  
294 2018). Therefore, either LHb GABAergic cells are rare enough to be missed in the  
295 single cell transcriptomes, or the habenula is devoid of GABAergic neurons.

296 We used *Gpr151* expression to mark the lateral, and to a lesser extent HbX,  
297 regions of the LHb. The *Gpr151+* neurons of the lateral LHb are the most well-studied  
298 neuronal subtype in the LHb and they receive major input from the lateral preoptic area,  
299 lateral hypothalamus, entopeduncular nucleus (EP), basal nucleus of the stria  
300 terminalis, and the nucleus of the diagonal band (Broms et al., 2017). These neurons  
301 also receive a minor input from the VTA, and are positioned to receive GABA/glutamate  
302 coreleasing input from both the EP and VTA (Root et al., 2014; Wallace et al., 2017).  
303 *Gpr151+* axons, likely arriving from the LHb, heavily innervate the RMTg and central  
304 and median raphe nucleus, but not the VTA (Broms et al., 2015). Our retrograde  
305 tracing studies from VTA neurons show that *Gpr151+* neurons tend to avoid  
306 dopaminergic VTA neurons, but heavily innervated the intermingled GABAergic neurons  
307 in this brain region (Figure 5). VTA GABAergic interneurons are functionally similar to  
308 inhibitory RMTg neurons (both populations inhibit VTA dopaminergic neurons (Cohen et

309 al., 2012; Ji and Shepard, 2007)), consistent with our results that both are innervated by  
310 lateral LHb. Furthermore, the lateral LHb is likely the major LHb subtype to translate  
311 aversive signals to VTA GABAergic neurons which become active following reward  
312 omission due to increased LHb input (Tian and Uchida, 2015). Overall, these cells are  
313 positioned to translate signals arriving from EP to downstream midbrain structures  
314 involved in both dopamine and serotonin signaling.

315 The oval/medial subregion of the LHb expresses high levels of *Chrm3*. Our  
316 previous studies indicate that this subtype is positioned to receive purely glutamatergic  
317 input from *Pvalb+/Slc16a7+* EP neurons that specifically target the lateral oval nucleus  
318 of the LHb (Wallace et al., 2017). Additionally, GABA/glutamate coreleasing EP  
319 neurons target the lateral oval (as well as the neighboring *Gpr151+* lateral LHb)  
320 providing overlapping, but differential EP input to this subregion (Wallace et al., 2017).  
321 Electrophysiological analysis has also shown preferential input from EP to the lateral  
322 LHb, specifically, to the neurons that project to RMTg (Meye et al., 2016).

323 The LHb primarily targets meso-prefrontal VTA dopamine neurons while avoiding  
324 other (mesolimbic and substantia nigra) dopamine neurons (Lammel et al., 2012). We  
325 were surprised to find that the majority of LHb neurons that projected to VTA dopamine  
326 neurons expressed *Chrm3*, a gene enriched in the oval/medial subregion, as previous  
327 retrograde tracing studies suggest that the marginal portion of the LHb projects heavily  
328 to the VTA ((Meye et al., 2016), but also see (Petzel et al., 2017; Quina et al., 2014)).  
329 Additional studies suggest that LHb neurons that target the VTA dopamine neurons may  
330 be distinct from those that target the RMTg; therefore, two populations of *Chrm3+* LHb  
331 neurons with different synaptic targets may exist (Lammel et al., 2012; Li et al., 2011;  
332 Maroteaux and Mameli, 2012). Additional genetic heterogeneity between *Chrm3+* oval  
333 and medial subdivisions could be further resolved with higher resolution sequencing  
334 methods (Bakken et al., 2018; Tasic et al., 2018). Nevertheless, our data show that  
335 VTA dopamine, and VTA GABAergic neurons are positioned to receive quite different  
336 synaptic input from the LHb due to their differential targeting by LHb neuronal subtypes.

337 *Vgf* expression was enriched in the marginal subtype of the LHb. Our retrograde  
338 tracing studies revealed that this subregion projects most heavily to the DRN, similar to  
339 other studies showing labeling of the medial half of the LHb following injections of

340 retrograde tracers into the raphe nucleus (Quina et al., 2014). Interestingly, this region  
341 also appears to receive dense input from serotonergic neurons of the raphe nuclei  
342 (Huang et al., 2019), and express *Htr2c* as well as several other serotonin receptors  
343 (See Table 4). We expect that this subregion also projects heavily to the lateral dorsal  
344 tegmental nucleus (LDTg) and posterior hypothalamic area (PH), as retrograde  
345 injections into these areas exclusively label the medial half of the LHb (Quina et al.,  
346 2014).

347

### 348 **Summary**

349 Progress in defining a function for the habenula has been hindered by incomplete  
350 understanding of its constituent cell-types and subregions. This study provides a  
351 comprehensive description of the neuronal classes in the lateral and medial habenula  
352 based on single-cell transcriptional profiling, FISH, and cell type specific monosynaptic  
353 retrograde tracing (Figure S7). Future studies will improve our understanding of the  
354 function of these habenula cell types by employing current optogenetic, chemogenetic,  
355 and electrophysiological approaches for precise control and monitoring of individual  
356 habenular populations.

357

358

359

360

361

362

363

364

365

366

367

368

369

370

371 **MATERIALS AND METHODS**

372 **Mice**

373 The following mouse strains/lines were used in this study: C57BL/6J (The Jackson  
374 Laboratory, Stock # 000664), *VGAT-IRES-Cre* (The Jackson Laboratory, Stock #  
375 016962), *DAT-IRES-Cre* (The Jackson Laboratory, Stock # 006660). Animals were kept  
376 on a 12:12 regular light/dark cycle under standard housing conditions. All procedures  
377 were performed in accordance with protocols approved by the Harvard Standing  
378 Committee on Animal Care following guidelines described in the U.S. National Institutes  
379 of Health Guide for the Care and Use of Laboratory Animals.

380

381 **Adeno-Associated Viruses (AAVs)**

382 Recombinant AAVs used for retrograde tracing experiments (AAV2/9-CAG-FLEX-TCB-  
383 mCherry, AAV2/9-CAG-FLEX-RVG) were commercially obtained from the Boston  
384 Children's Hospital Viral Core (Addgene # 48332 and 48333, respectively). Virus  
385 aliquots were stored at -80 °C, and were injected at a concentration of approximately  
386  $10^{11}$  or  $10^{12}$  GC/ml, respectively.

387

388 **Rabies Viruses**

389 Rabies viruses used for retrograde tracing (B19G-SADΔG-EGFP) were generated in-  
390 house (Wickersham et al., 2010). Virions were amplified from existing stocks in three  
391 rounds of low-MOI passaging through BHK-B19G cells by transfer of filtered  
392 supernatant, with 3 to 4 days between passages. Cells were grown at 35 °C and 5%  
393 CO<sub>2</sub> in DMEM with GlutaMAX (Thermo Scientific, #10569010) supplemented with 5%  
394 heat-inactivated FBS (Thermo Scientific #10082147) and antibiotic-antimycotic (Thermo  
395 Scientific #15240-062). Virions were concentrated from media from dishes containing  
396 virion-generating cells by first collecting and incubating with benzonase nuclease  
397 (1:1000, Millipore #70664) at 37°C for 30 min, followed by filtration through a 0.22 μm  
398 PES filter. The filtered supernatant was transferred to ultracentrifuge tubes (Beckman  
399 Coulter #344058) with 2 ml of 20% sucrose in dPBS cushion and ultracentrifuged at  
400 20,000 RPM (Beckman Coulter SW 32 Ti rotor) at 4°C for 2 hours. The supernatant was  
401 discarded and the pellet was resuspended in dPBS for 6 hours on an orbital shaker at



402 4 °C before aliquots were prepared and frozen for long-term storage at -80 °C.  
403 Unpseudotyped rabies virus titers were estimated based on a serial dilution method  
404 counting infected HEK 293T cells, and quantified as infectious units per ml (IU/ml).  
405 Pseudotyped rabies virus (SAD B19 strain, EnvA-RbV-GFP, Addgene# 52487) was  
406 commercially obtained from the Janelia Viral Tools Facility stored at -80°C, and injected  
407 at a concentration of approximately 10<sup>8</sup> IU/ml.

408

### 409 **Stereotaxic Surgeries**

410 Adult mice were anesthetized with isoflurane (5%) and placed in a small animal  
411 stereotaxic frame (David Kopf Instruments). After exposing the skull under aseptic  
412 conditions, viruses were injected through a pulled glass pipette at a rate of 50 nl/min  
413 using a UMP3 microsyringe pump (World Precision Instruments). Pipettes were slowly  
414 withdrawn (< 100 µm/s) at least 10 min after the end of the infusion. Following wound  
415 closure, mice were placed in a cage with a heating pad until their activity was recovered  
416 before returning to their home cage. Mice were given pre- and post-operative  
417 subcutaneous ketoprofen (10mg/kg/day) as an analgesic, and monitored daily for at  
418 least 4 days post-surgery. Injection coordinates from Bregma for VTA were -3.135mm  
419 A/P, 0.4mm M/L, and 4.4mm D/V and for DRN were -6.077mm A/P, 0.1mm M/L, and -  
420 3.33mm D/V at -40°. Injection volumes for specific anatomical regions and virus types  
421 were as follows VTA: 200 nL AAV (mix of helper viruses), 250 nL EnvA-RbV-GFP (21  
422 days after injection of AAV), DRN: 300 nL of RbV-GFP. Animals injected with rabies  
423 virus were perfused 7 days after injection in a biosafety level 2 animal facility.

424

### 425 **Single Cell Dissociation and RNA Sequencing**

426 8- to 10-week old C57BL/6J mice were pair-housed in a regular 12:12 light/dark cycle  
427 room prior to tissue collection. Mice were transcardially perfused with an ice-cold  
428 choline cutting solution (110 mM choline chloride, 25 mM sodium bicarbonate, 12 mM  
429 D-glucose, 11.6 mM sodium L-ascorbate, 10 mM HEPES, 7.5 mM magnesium chloride,  
430 3.1 mM sodium pyruvate, 2.5 mM potassium chloride, 1.25 mM sodium phosphate  
431 monobasic, saturated with bubbling 95% oxygen/5% carbon dioxide, pH adjusted to 7.4  
432 using sodium hydroxide). Brains were rapidly dissected out and sliced into 200 µm thick



433 coronal sections on a vibratome (Leica Biosystems, VT1000) with a chilled cutting  
434 chamber filled with choline cutting solution. Coronal slices containing the habenula were  
435 then transferred to a chilled dissection dish containing a choline-based cutting solution  
436 for microdissection. Dissected tissue chunks were transferred to cold HBSS-based  
437 dissociation media (Thermo Fisher Scientific Cat. # 14170112, supplemented to final  
438 content concentrations: 138 mM sodium chloride, 11 mM D-glucose, 10 mM HEPES,  
439 5.33 mM potassium chloride, 4.17 mM sodium bicarbonate, 2.12 mM magnesium  
440 chloride, 0.441 mM potassium phosphate monobasic, 0.338 mM sodium phosphate  
441 monobasic, saturated with bubbling 95% oxygen/5% carbon dioxide, pH adjusted to  
442 7.35 using sodium hydroxide) and kept on ice until dissections were completed.  
443 Dissected tissue chunks for each sample were pooled for each hemisphere for the  
444 subsequent dissociation steps. Tissue chunks were first mixed with a digestion cocktail  
445 (dissociation media, supplemented to working concentrations: 20 U/ml papain, 0.05  
446 mg/mL DNase I) and incubated at 34 °C for 90 min with gentle rocking. The digestion  
447 was quenched by adding dissociation media supplemented with 0.2% BSA and 10  
448 mg/ml ovomucoid inhibitor (Worthington Cat. # LK003128), and samples were kept  
449 chilled for the rest of the dissociation procedure. Digested tissue was collected by brief  
450 centrifugation (5 min, 300 g), re-suspended in dissociation media supplemented with  
451 0.2% BSA, 1 mg/ml ovomucoid inhibitor, and 0.05 mg/mL DNase I. Tissue chunks were  
452 then mechanically triturated using fine-tip plastic micropipette tips of progressively  
453 decreasing size. The triturated cell suspension was filtered through a 40 µm cell strainer  
454 (Corning 352340) and washed in two repeated centrifugation (5 min, 300 g) and re-  
455 suspension steps to remove debris before a final re-suspension in dissociation media  
456 containing 0.04% BSA and 15% OptiPrep (Sigma D1556). Cell density was calculated  
457 based on hemocytometer counts and adjusted to approximately 100,000 cells/ml.  
458 Single-cell encapsulation and RNA capture on the InDrop platform was performed at the  
459 Harvard Medical School ICCB Single Cell Core using v3 chemistry hydrogels based on  
460 previously described protocols (Zilionis et al., 2017). Suspensions were kept chilled until  
461 the cells were flowed into the microfluidic device. Libraries were prepared and indexed  
462 following the protocols referenced above, and sequencing-ready libraries were stored at

463 -80 °C. Libraries from different samples were pooled and sequenced on an Illumina  
464 NextSeq 500 (High Output v2 kits).

465

### 466 **Sequencing Data Processing**

467 NGS data was processed using previously a published pipeline in Python available at  
468 [<https://github.com/indrops/indrops>] (Klein et al., 2015). Briefly, reads were filtered by  
469 expected structure and sorted by the corresponding library index. Valid reads were then  
470 demultiplexed and sorted by cell barcodes. Cell barcodes containing fewer than 250  
471 total reads were discarded, and remaining reads were aligned to a reference mouse  
472 transcriptome (Ensembl GRCm38 release 87) using Bowtie 1.1.1 (m = 200, n = 1, l =  
473 15, e = 1000). Aligned reads were then quantified as UMI-filtered mapped read  
474 (UMIFM) counts. UMIFM counts and quantification metrics for each cell were combined  
475 into a single file sorted by library and exported as a gunzipped TSV file.

476

### 477 **Pre-Clustering Filtering and Normalization**

478 Analysis of the processed NGS data was performed in R (version 3.4.4) using the  
479 Seurat package (version 2.3.4) (Butler et al., 2018; Satija et al., 2015). Cells with fewer  
480 than 500 UMIFM counts and 200 genes were removed. The expression data matrix  
481 (Genes x Cells) was filtered to retain genes with > 5 UMIFM counts, and then loaded  
482 into a Seurat object along with the library metadata for downstream processing. The  
483 percentage of mitochondrial transcripts for each cell (percent.mito) was calculated and  
484 added as metadata to the Seurat object. Cells in the object were further filtered using  
485 the following parameters: nUMI – min. 500, max. 18000; nGene – min. 200, max. 6000;  
486 percent.mito – min. -Inf, max. 0.1. Low quality libraries identified as outliers on scatter  
487 plots of quality control metrics (e.g. unusually low gradient on the nGene vs. nUMI) were  
488 also removed from the dataset. Filtered Seurat objects were then log-normalized at  
489 10,000 transcripts per cell. Effects of latent variables (nUMI, percent.mito) were  
490 estimated and regressed out using a GLM (`ScaleData` function, `model.use =`  
491 `"linear"`), and the scaled and centered residuals were used for dimensionality  
492 reduction and clustering.

493

## 494 **Cell Clustering and Cluster Identification**

495 Initial clustering was performed on the dataset using the first 20 PCs, and t-SNE was  
496 used only for data visualization. Clustering was run using the SNN-based  
497 `FindClusters` function using the SLM algorithm and 10 iterations. Clustering was  
498 performed at varying resolution values, and we chose a final value of 1.2 for the  
499 resolution parameter for this stage of clustering. Clusters were assigned preliminary  
500 identities based on expression of combinations of known enriched genes for major cell  
501 classes and types. The full list of enriched genes is provided in Table 2 and average  
502 expression of all genes in all clusters is provided in Table 1. Low quality cells were  
503 identified based on a combination of low gene/UMIFM counts and high levels of  
504 mitochondrial and nuclear transcripts (e.g. *Malat1*, *Meg3*, *Kcnq1ot1*) typically clustered  
505 together and were removed. Following assignment of preliminary identities, cells were  
506 divided into data subsets as separate Seurat objects (LHb neurons and MHb neurons)  
507 for further subclustering. The expression matrix for each data subset was further  
508 filtered to include only genes expressed by the cells in the subset (minimum cell  
509 threshold of 0.5% of cells in the subset). Subclustering was performed iteratively on  
510 each data subset to resolve additional cell types and subtypes. Briefly, clustering was  
511 run at high resolution, and the resulting clusters were ordered in a cluster dendrogram  
512 using the `BuildClusterTree` function in Seurat which uses cluster averaged PCs for  
513 calculating a PC distance matrix. Putative doublets/multiplets were identified based on  
514 expression of known enriched genes for different cell types not in the cell subset (e.g.  
515 neuronal and glial specific genes). Putative doublets tended to separate from other  
516 cells and cluster together, and these clusters were removed from the dataset. Cluster  
517 separation was evaluated using the `AssessNodes` function and inspection of  
518 differentially expressed genes at each node. Clusters with poor separation, based  
519 differential expression of mostly housekeeping genes, or activity dependent genes (see  
520 Figure S2) were merged to avoid over-separation of the data. The dendrogram was  
521 reconstructed after merging or removal of clusters, and the process of inspecting and  
522 merging or removing clusters was repeated until all resulting clusters could be  
523 distinguished based on a set of differentially expressed genes that we could validate  
524 separately. To calculate the “ADG Score” (Figure S2) we used the `AddModuleScore`

525 function in Seurat using a list of ADGs that were highly expressed in some of the MHB  
526 clusters (*Fos*, *Fosb*, *Egr1*, *Junb*, *Nr4a1*, *Dusp18*, *Jun*, *Jund*).

527

### 528 **Differential Expression Tests**

529 Tests for differential gene expression were performed using MAST (version 1.10.1)

530 (Finak et al., 2015) through the `FindMarkersNode` function in Seurat

531 (`logfc.threshold = 0.25`, `min.pct = 0.1`). Adjusted *P* values were corrected

532 using the Bonferroni correction for multiple comparisons ( $P < 0.05$ ).

533

### 534 **Fluorescence In-Situ Hybridization (FISH)**

535 Mice were deeply anesthetized with isoflurane, decapitated, and their brains were

536 quickly removed and frozen in tissue freezing medium on dry ice. Brains were cut on a

537 cryostat (Leica CM 1950) into 30  $\mu$ m sections, adhered to SuperFrost Plus slides

538 (VWR), and immediately refrozen. Samples were fixed 4% paraformaldehyde and

539 processed according to ACD RNAscope Fluorescent Multiplex Assay manual. Sections

540 were incubated at room temperature for 30 seconds with DAPI, excess liquid was

541 removed, and immediately coverslipped with ProLong antifade reagent (Molecular

542 Probes). Antisense probes for *RbV-N*, *Gpr151*, *Sst*, *Chrm3*, *Vgf*, *Cre*, *Slc17a6*,

543 *Slc32a1*, and *Slc6a3* were purchased from Advanced Cell Diagnostics (ACD,

544 <http://acdbio.com/>). Sections were imaged at 1920 X 1440 pixels on a Keyence BZ-

545 X710 fluorescence microscope using a 10X, 0.45 NA air Nikon Plan Apo objective.

546 Individual imaging planes were overlaid and quantified for colocalization in ImageJ

547 (NIH) and Matlab (Mathworks).

548

### 549 **Image Analysis**

550 FISH images were analyzed for “fluorescence coverage (%)” meaning the proportion of

551 fluorescent pixels to total pixels in a cellular ROI, using a custom macro in Image J and

552 custom scripts in Matlab (Figure 4, S5, and S6). 5-10 images from at least 3 mice were

553 analyzed for each condition. Cell ROIs were automatically determined based on

554 fluorescence signals in all three channels (or by fluorescence in the *RbV-N* channel for

555 rabies tracing experiments), and manually adjusted prior to analysis to ensure that all

556 cell ROIs reflected individual cells and not clusters. After background subtraction (the  
557 signal outside of cell ROIs) and application of a fluorescence threshold (Renyi Entropy),  
558 the amount of fluorescent pixels in each optical channel was counted within the cellular  
559 ROI. All images compared underwent identical thresholding and no other manipulations  
560 were made. These data were used to generate X-Y plots displaying the percent  
561 coverage for each channel per cell (Figure 4, S5, and S6).

562

### 563 **ACKNOWLEDGEMENTS**

564 The authors would like to thank Sarah Melzer and Adam Granger for assistance with  
565 FISH analysis; James Levasseur for animal husbandry and genotyping; L. Worth for  
566 administrative assistance; HMS ICCB Single Cell Core for assistance with scRNA-seq  
567 experiments on the InDrop platform; The Bauer Core Facility at Harvard University for  
568 sequencing support and the members of the Sabatini Lab for their helpful discussions  
569 and advice. Starting materials for generating nonpseudotyped rabies virus is a  
570 generous gift from B.K. Lim (UCSD). This work was supported by the Howard Hughes  
571 Medical Institute (B.L.S.), NIH, National Institute of Neurological Disease and Stroke  
572 (K99 NS105883 to M.L.W and NS103226 to B.L.S.).

573

### 574 **COMPETING INTERESTS**

575 The authors declare no financial or non-financial competing interests.

576

577

578

579

580

581

582

583

584

585

586

587 **REFERENCES**

- 588 Andres, K.H., Doring, M. Von, Veh, R.W., 1999. Subnuclear organization of the rat  
589 habenular complexes. *J. Comp. Neurol.* 407, 130–150.  
590 [https://doi.org/10.1002/\(SICI\)1096-9861\(19990428\)407:1<130::AID-](https://doi.org/10.1002/(SICI)1096-9861(19990428)407:1<130::AID-CNE10>3.0.CO;2-8)  
591 [CNE10>3.0.CO;2-8](https://doi.org/10.1002/(SICI)1096-9861(19990428)407:1<130::AID-CNE10>3.0.CO;2-8)
- 592 Bakken, T.E., Hodge, R.D., Miller, J.A., Yao, Z., Nguyen, T.N., Aebermann, B., Barkan,  
593 E., Bertagnolli, D., Casper, T., Dee, N., Garren, E., Goldy, J., Graybuck, L.T., Kroll,  
594 M., Lasken, R.S., Lathia, K., Parry, S., Rimorin, C., Scheuermann, R.H., Schork,  
595 N.J., Shehata, S.I., Tieu, M., Phillips, J.W., Bernard, A., Smith, K.A., Zeng, H., Lein,  
596 E.S., Tasic, B., 2018. Single-nucleus and single-cell transcriptomes compared in  
597 matched cortical cell types. *PLoS One* 13, e0209648.  
598 <https://doi.org/10.1371/journal.pone.0209648>
- 599 Beier, K.T., Steinberg, E.E., DeLoach, K.E., Xie, S., Miyamichi, K., Schwarz, L., Gao,  
600 X.J., Kremer, E.J., Malenka, R.C., Luo, L., 2015. Circuit Architecture of VTA  
601 Dopamine Neurons Revealed by Systematic Input-Output Mapping. *Cell* 162, 622–  
602 634. <https://doi.org/10.1016/j.cell.2015.07.015>
- 603 Broms, J., Antolin-Fontes, B., Tingström, A., Ibañez-Tallon, I., 2015. Conserved  
604 expression of the GPR151 receptor in habenular axonal projections of vertebrates.  
605 *J. Comp. Neurol.* 523, 359–380. <https://doi.org/10.1002/cne.23664>
- 606 Broms, J., Grahm, M., Haugegaard, L., Blom, T., Meletis, K., Tingström, A., 2017.  
607 Monosynaptic retrograde tracing of neurons expressing the G-protein coupled  
608 receptor Gpr151 in the mouse brain. *J. Comp. Neurol.* 525, 3227–3250.  
609 <https://doi.org/10.1002/cne.24273>
- 610 Butler, A., Hoffman, P., Smibert, P., Papalexi, E., Satija, R., 2018. Integrating single-cell  
611 transcriptomic data across different conditions, technologies, and species. *Nat.*  
612 *Biotechnol.* 36, 411–420. <https://doi.org/10.1038/nbt.4096>
- 613 Cohen, J.Y., Haesler, S., Vong, L., Lowell, B.B., Uchida, N., 2012. Neuron-type-specific  
614 signals for reward and punishment in the ventral tegmental area. *Nature* 482, 85–  
615 88. <https://doi.org/10.1038/nature10754>
- 616 Concha, M.L., Wilson, S.W., 2001. Asymmetry in the epithalamus of vertebrates. *J.*  
617 *Anat.* 199, 63–84. <https://doi.org/10.1046/j.1469-7580.2001.19910063.x>



- 618 D'Souza, M.S., 2016. Neuroscience of nicotine for addiction medicine: novel targets for  
619 smoking cessation medications. *Prog. Brain Res.* 223, 191–214.  
620 <https://doi.org/10.1016/bs.pbr.2015.07.008>
- 621 Finak, G., McDavid, A., Yajima, M., Deng, J., Gersuk, V., Shalek, A.K., Slichter, C.K.,  
622 Miller, H.W., McElrath, M.J., Prlic, M., Linsley, P.S., Gottardo, R., 2015. MAST: a  
623 flexible statistical framework for assessing transcriptional changes and  
624 characterizing heterogeneity in single-cell RNA sequencing data. *Genome Biol.* 16,  
625 278. <https://doi.org/10.1186/s13059-015-0844-5>
- 626 Fowler, C.D., Lu, Q., Johnson, P.M., Marks, M.J., Kenny, P.J., 2011. Habenular  $\alpha 5$   
627 nicotinic receptor subunit signalling controls nicotine intake. *Nature* 471, 597–601.  
628 <https://doi.org/10.1038/nature09797>
- 629 Gonçalves, L., Segó, C., Metzger, M., 2012. Differential projections from the lateral  
630 habenula to the rostromedial tegmental nucleus and ventral tegmental area in the  
631 rat. *J. Comp. Neurol.* 520, 1278–300. <https://doi.org/10.1002/cne.22787>
- 632 Herkenham, M., Nauta, W.J., 1977. Afferent connections of the habenular nuclei in the  
633 rat. A horseradish peroxidase study, with a note on the fiber-of-passage problem. *J.*  
634 *Comp. Neurol.* 173, 123–46. <https://doi.org/10.1002/cne.901730107>
- 635 Herkenham, M., Nauta, W.J.H., 1979. Efferent connections of the habenular nuclei in  
636 the rat. *J. Comp. Neurol.* 187, 19–47. <https://doi.org/10.1002/cne.901870103>
- 637 Hikosaka, O., 2010. The habenula: from stress evasion to value-based decision-  
638 making. *Nat. Rev. Neurosci.* 11, 503–13. <https://doi.org/10.1038/nrn2866>
- 639 Hsu, Y.-W.A., Morton, G., Guy, E.G., Wang, S.D., Turner, E.E., 2016. Dorsal Medial  
640 Habenula Regulation of Mood-Related Behaviors and Primary Reinforcement by  
641 Tachykinin-Expressing Habenula Neurons. *eNeuro* 3.  
642 <https://doi.org/10.1523/ENEURO.0109-16.2016>
- 643 Hsu, Y.-W.A., Wang, S.D., Wang, S., Morton, G., Zariwala, H.A., de la Iglesia, H.O.,  
644 Turner, E.E., 2014. Role of the Dorsal Medial Habenula in the Regulation of  
645 Voluntary Activity, Motor Function, Hedonic State, and Primary Reinforcement. *J.*  
646 *Neurosci.* 34, 11366–11384. <https://doi.org/10.1523/JNEUROSCI.1861-14.2014>
- 647 Huang, K.W., Ochandarena, N.E., Philson, A.C., Hyun, M., Birnbaum, J.E., Cicconet,  
648 M., Sabatini, B.L., 2019. Molecular and anatomical organization of the dorsal raphe



649 nucleus. *Elife* 8. <https://doi.org/10.7554/eLife.46464>

650 Ji, H., Shepard, P.D., 2007. Lateral habenula stimulation inhibits rat midbrain dopamine  
651 neurons through a GABA(A) receptor-mediated mechanism. *J. Neurosci.* 27, 6923–  
652 30. <https://doi.org/10.1523/JNEUROSCI.0958-07.2007>

653 Klein, A.M., Mazutis, L., Akartuna, I., Tallapragada, N., Veres, A., Li, V., Peshkin, L.,  
654 Weitz, D.A., Kirschner, M.W., 2015. Droplet barcoding for single-cell  
655 transcriptomics applied to embryonic stem cells. *Cell* 161, 1187–1201.  
656 <https://doi.org/10.1016/j.cell.2015.04.044>

657 Lammel, S., Lim, B.K., Ran, C., Huang, K.W., Betley, M.J., Tye, K.M., Deisseroth, K.,  
658 Malenka, R.C., 2012. Input-specific control of reward and aversion in the ventral  
659 tegmental area. *Nature* 491, 212–7. <https://doi.org/10.1038/nature11527>

660 Lecca, S., Meye, F.J., Mameli, M., 2014. The lateral habenula in addiction and  
661 depression: an anatomical, synaptic and behavioral overview. *Eur. J. Neurosci.* 39,  
662 1170–1178. <https://doi.org/10.1111/ejn.12480>

663 Lein, E.S., Hawrylycz, M.J., Ao, N., Ayres, M., Bensinger, A., Bernard, A., Boe, A.F.,  
664 Boguski, M.S., Brockway, K.S., Byrnes, E.J., Chen, Lin, Chen, Li, Chen, T.-M., Chi  
665 Chin, M., Chong, J., Crook, B.E., Czaplinska, A., Dang, C.N., Datta, S., Dee, N.R.,  
666 Desaki, A.L., Desta, T., Diep, E., Dolbeare, T.A., Donelan, M.J., Dong, H.-W.,  
667 Dougherty, J.G., Duncan, B.J., Ebbert, A.J., Eichele, G., Estin, L.K., Faber, C.,  
668 Facer, B.A., Fields, R., Fischer, S.R., Fliss, T.P., Frensley, C., Gates, S.N.,  
669 Glattfelder, K.J., Halverson, K.R., Hart, M.R., Hohmann, J.G., Howell, M.P., Jeung,  
670 D.P., Johnson, R.A., Karr, P.T., Kaval, R., Kidney, J.M., Knapik, R.H., Kuan, C.L.,  
671 Lake, J.H., Laramée, A.R., Larsen, K.D., Lau, C., Lemon, T.A., Liang, A.J., Liu, Y.,  
672 Luong, L.T., Michaels, J., Morgan, J.J., Morgan, R.J., Mortrud, M.T., Mosqueda,  
673 N.F., Ng, L.L., Ng, R., Orta, G.J., Overly, C.C., Pak, T.H., Parry, S.E., Pathak, S.D.,  
674 Pearson, O.C., Puchalski, R.B., Riley, Z.L., Rockett, H.R., Rowland, S.A., Royall,  
675 J.J., Ruiz, M.J., Sarno, N.R., Schaffnit, K., Shapovalova, N. V., Svisay, T.,  
676 Slaughterbeck, C.R., Smith, S.C., Smith, K.A., Smith, B.I., Sodt, A.J., Stewart, N.N.,  
677 Stumpf, K.-R., Sunkin, S.M., Sutram, M., Tam, A., Teemer, C.D., Thaller, C.,  
678 Thompson, C.L., Varnam, L.R., Visel, A., Whitlock, R.M., Wohnoutka, P.E., Wolkey,  
679 C.K., Wong, V.Y., Wood, M., Yaylaoglu, M.B., Young, R.C., Youngstrom, B.L.,

- 680 Feng Yuan, X., Zhang, B., Zwingman, T.A., Jones, A.R., 2007. Genome-wide atlas  
681 of gene expression in the adult mouse brain. *Nature* 445, 168–176.  
682 <https://doi.org/10.1038/nature05453>
- 683 Li, B., Piriz, J., Mirrione, M., Chung, C., Proulx, C.D., Schulz, D., Henn, F., Malinow, R.,  
684 2011. Synaptic potentiation onto habenula neurons in the learned helplessness  
685 model of depression. *Nature* 470, 535–539. <https://doi.org/10.1038/nature09742>
- 686 Li, K., Zhou, T., Liao, L., Yang, Z., Wong, C., Henn, F., Malinow, R., Yates, J.R., Hu, H.,  
687 2013.  $\beta$ CaMKII in lateral habenula mediates core symptoms of depression. *Science*  
688 341, 1016–20. <https://doi.org/10.1126/science.1240729>
- 689 Maroteaux, M., Mameli, M., 2012. Cocaine Evokes Projection-Specific Synaptic  
690 Plasticity of Lateral Habenula Neurons. *J. Neurosci.* 32, 12641–12646.  
691 <https://doi.org/10.1523/JNEUROSCI.2405-12.2012>
- 692 Matsumoto, M., Hikosaka, O., 2007. Lateral habenula as a source of negative reward  
693 signals in dopamine neurons. *Nature* 447, 1111–5.  
694 <https://doi.org/10.1038/nature05860>
- 695 Meye, F.J., Soiza-Reilly, M., Smit, T., Diana, M.A., Schwarz, M.K., Mameli, M., 2016.  
696 Shifted pallidal co-release of GABA and glutamate in habenula drives cocaine  
697 withdrawal and relapse. *Nat. Neurosci.* 19, 1019–1024.  
698 <https://doi.org/10.1038/nn.4334>
- 699 Mizumori, S.J.Y., Baker, P.M., 2017. The Lateral Habenula and Adaptive Behaviors.  
700 *Trends Neurosci.* 40, 481–493. <https://doi.org/10.1016/j.tins.2017.06.001>
- 701 Moffitt, J.R., Bambah-Mukku, D., Eichhorn, S.W., Vaughn, E., Shekhar, K., Perez, J.D.,  
702 Rubinstein, N.D., Hao, J., Regev, A., Dulac, C., Zhuang, X., 2018. Molecular,  
703 spatial, and functional single-cell profiling of the hypothalamic preoptic region.  
704 *Science* 362, eaau5324. <https://doi.org/10.1126/science.aau5324>
- 705 Morales, M., Margolis, E.B., 2017. Ventral tegmental area: cellular heterogeneity,  
706 connectivity and behaviour. *Nat. Rev. Neurosci.* 18, 73–85.  
707 <https://doi.org/10.1038/nrn.2016.165>
- 708 Pandey, S., Shekhar, K., Regev, A., Schier, A.F., 2018. Comprehensive Identification  
709 and Spatial Mapping of Habenular Neuronal Types Using Single-Cell RNA-Seq.  
710 *Curr. Biol.* 28, 1052-1065.e7. <https://doi.org/10.1016/j.cub.2018.02.040>

- 711 Petzel, A., Bernard, R., Poller, W.C., Veh, udiger W., 2017. Anterior and posterior parts  
712 of the rat ventral tegmental area and the rostromedial tegmental nucleus receive  
713 topographically distinct afferents from the lateral habenular complex *Comparative*  
714 *Neurology. J Comp Neurol* 525, 2310–2327. <https://doi.org/10.1002/cne.24200>
- 715 Proulx, C.D., Hikosaka, O., Malinow, R., 2014. Reward processing by the lateral  
716 habenula in normal and depressive behaviors. *Nat. Neurosci.* 17, 1146–1152.  
717 <https://doi.org/10.1038/nn.3779>
- 718 Quina, L. a., Tempest, L., Ng, L., Harris, J., Ferguson, S., Jhou, T., Turner, E.E., 2014.  
719 Efferent pathways of the mouse lateral habenula. *J. Comp. Neurol.* 00.  
720 <https://doi.org/10.1002/cne>.
- 721 Quina, L.A., Tempest, L., Ng, L., Harris, J.A., Ferguson, S., Jhou, T.C., Turner, E.E.,  
722 2015. Efferent Pathways of the Mouse Lateral Habenula. *J. Comp. Neurol.* 523,  
723 32–60. <https://doi.org/10.1002/cne.23662>
- 724 Ren, J., Qin, C., Hu, F., Tan, J., Qiu, L., Zhao, S., Feng, G., Luo, M., 2011. Habenula  
725 “Cholinergic” Neurons Corelease Glutamate and Acetylcholine and Activate  
726 Postsynaptic Neurons via Distinct Transmission Modes. *Neuron* 69, 445–452.  
727 <https://doi.org/10.1016/J.NEURON.2010.12.038>
- 728 Root, D.H., Mejias-aponte, C. a, Zhang, S., Wang, H., Hoffman, A.F., Lupica, C.R.,  
729 Morales, M., 2014. Single rodent mesohabenular axons release glutamate and  
730 GABA. *Nat. Neurosci.* 17. <https://doi.org/10.1038/nn.3823>
- 731 Satija, R., Farrell, J.A., Gennert, D., Schier, A.F., Regev, A., 2015. Spatial  
732 reconstruction of single-cell gene expression data. *Nat. Biotechnol.* 33, 495–502.  
733 <https://doi.org/10.1038/nbt.3192>
- 734 Saunders, A., Macosko, E.Z., Wysoker, A., Goldman, M., Krienen, F.M., de Rivera, H.,  
735 Bien, E., Baum, M., Bortolin, L., Wang, S., Goeva, A., Nemesh, J., Kamitaki, N.,  
736 Brumbaugh, S., Kulp, D., McCarroll, S.A., 2018. Molecular Diversity and  
737 Specializations among the Cells of the Adult Mouse Brain. *Cell* 174, 1015-  
738 1030.e16. <https://doi.org/10.1016/j.cell.2018.07.028>
- 739 Shih, P.-Y., Engle, S.E., Oh, G., Deshpande, P., Puskar, N.L., Lester, H.A., Drenan,  
740 R.M., 2014. Differential expression and function of nicotinic acetylcholine receptors  
741 in subdivisions of medial habenula. *J. Neurosci.* 34, 9789–802.

- 742 <https://doi.org/10.1523/JNEUROSCI.0476-14.2014>
- 743 Soria-Gómez, E., Busquets-Garcia, A., Hu, F., Mehidi, A., Cannich, A., Roux, L., Loutit,  
744 I., Alonso, L., Wiesner, T., Georges, F., Verrier, D., Vincent, P., Ferreira, G., Luo,  
745 M., Marsicano, G., 2015. Habenular CB1 Receptors Control the Expression of  
746 Aversive Memories. *Neuron* 88, 306–13.  
747 <https://doi.org/10.1016/j.neuron.2015.08.035>
- 748 Tasic, B., Yao, Z., Graybuck, L.T., Smith, K.A., Nguyen, T.N., Bertagnolli, D., Goldy, J.,  
749 Garren, E., Economo, M.N., Viswanathan, S., Penn, O., Bakken, T., Menon, V.,  
750 Miller, J., Fong, O., Hirokawa, K.E., Lathia, K., Rimorin, C., Tieu, M., Larsen, R.,  
751 Casper, T., Barkan, E., Kroll, M., Parry, S., Shapovalova, N. V., Hirschstein, D.,  
752 Pendergraft, J., Sullivan, H.A., Kim, T.K., Szafer, A., Dee, N., Groblewski, P.,  
753 Wickersham, I., Cetin, A., Harris, J.A., Levi, B.P., Sunkin, S.M., Madisen, L., Daigle,  
754 T.L., Looger, L., Bernard, A., Phillips, J., Lein, E., Hawrylycz, M., Svoboda, K.,  
755 Jones, A.R., Koch, C., Zeng, H., 2018. Shared and distinct transcriptomic cell types  
756 across neocortical areas. *Nature* 563, 72–78. [https://doi.org/10.1038/s41586-018-](https://doi.org/10.1038/s41586-018-0654-5)  
757 [0654-5](https://doi.org/10.1038/s41586-018-0654-5)
- 758 Tian, J., Uchida, N., 2015. Habenula Lesions Reveal that Multiple Mechanisms Underlie  
759 Dopamine Prediction Errors. *Neuron* 87, 1304–1316.  
760 <https://doi.org/10.1016/j.neuron.2015.08.028>
- 761 Tritsch, N.X., Ding, J.B., Sabatini, B.L., 2012. Dopaminergic neurons inhibit striatal  
762 output through non-canonical release of GABA. *Nature* 490, 262–6.  
763 <https://doi.org/10.1038/nature11466>
- 764 Wagner, F., French, L., Veh, R.W., 2016. Transcriptomic-anatomic analysis of the  
765 mouse habenula uncovers a high molecular heterogeneity among neurons in the  
766 lateral complex, while gene expression in the medial complex largely obeys  
767 subnuclear boundaries. *Brain Struct. Funct.* 221, 39–58.  
768 <https://doi.org/10.1007/s00429-014-0891-9>
- 769 Wagner, F., Stroh, T., Veh, R.W., 2014. Correlating habenular subnuclei in rat and  
770 mouse by using topographic, morphological, and cytochemical criteria. *J. Comp.*  
771 *Neurol.* 522, 2650–2662. <https://doi.org/10.1002/cne.23554>
- 772 Wallace, M.L., Saunders, A., Huang, K.W., Philson, A.C., Goldman, M., Macosko, E.Z.,

- 773 McCarroll, S.A., Sabatini, B.L., 2017. Genetically Distinct Parallel Pathways in the  
774 Entopeduncular Nucleus for Limbic and Sensorimotor Output of the Basal Ganglia.  
775 Neuron 94, 138-152.e5. <https://doi.org/10.1016/j.neuron.2017.03.017>
- 776 Wang, D., Li, Y., Feng, Q., Guo, Q., Zhou, J., Luo, M., 2017. Learning shapes the  
777 aversion and reward responses of lateral habenula neurons. Elife 6.  
778 <https://doi.org/10.7554/eLife.23045>
- 779 Watabe-Uchida, M., Zhu, L., Ogawa, S.K., Vamanrao, A., Uchida, N., 2012. Whole-  
780 brain mapping of direct inputs to midbrain dopamine neurons. Neuron 74, 858–73.  
781 <https://doi.org/10.1016/j.neuron.2012.03.017>
- 782 Wickersham, I.R., Lyon, D.C., Barnard, R.J.O., Mori, T., Finke, S., Conzelmann, K.-K.,  
783 Young, J.A.T., Callaway, E.M., 2007. Monosynaptic restriction of transsynaptic  
784 tracing from single, genetically targeted neurons. Neuron 53, 639–47.  
785 <https://doi.org/10.1016/j.neuron.2007.01.033>
- 786 Wickersham, I.R., Sullivan, H.A., Seung, H.S., 2010. Production of glycoprotein-deleted  
787 rabies viruses for monosynaptic tracing and high-level gene expression in neurons.  
788 Nat. Protoc. 5, 595–606. <https://doi.org/10.1038/nprot.2009.248>
- 789 Yetnikoff, L., Cheng, A.Y., Lavezzi, H.N., Parsley, K.P., Zahm, D.S., 2015. Sources of  
790 input to the rostromedial tegmental nucleus, ventral tegmental area, and lateral  
791 habenula compared: A study in rat. J. Comp. Neurol. 523, 2426–56.  
792 <https://doi.org/10.1002/cne.23797>
- 793 Zahm, D.S., Root, D.H., 2017. Review of the cytology and connections of the lateral  
794 habenula, an avatar of adaptive behaving. Pharmacol. Biochem. Behav. 162, 3–21.  
795 <https://doi.org/10.1016/j.pbb.2017.06.004>
- 796 Zeisel, A., Hochgerner, H., Lönnerberg, P., Johnsson, A., Memic, F., van der Zwan, J.,  
797 Häring, M., Braun, E., Borm, L.E., La Manno, G., Codeluppi, S., Furlan, A., Lee, K.,  
798 Skene, N., Harris, K.D., Hjerling-Leffler, J., Arenas, E., Ernfors, P., Marklund, U.,  
799 Linnarsson, S., 2018. Molecular Architecture of the Mouse Nervous System. Cell  
800 174, 999-1014.e22. <https://doi.org/10.1016/j.cell.2018.06.021>
- 801 Zhang, L., Hernández, V.S., Swinny, J.D., Verma, A.K., Giesecke, T., Emery, A.C.,  
802 Mutig, K., Garcia-Segura, L.M., Eiden, L.E., 2018. A GABAergic cell type in the  
803 lateral habenula links hypothalamic homeostatic and midbrain motivation circuits

804 with sex steroid signaling. *Transl. Psychiatry* 8, 50. <https://doi.org/10.1038/s41398->  
805 018-0099-5

806 Zhao-Shea, R., Liu, L., Pang, X., Gardner, P.D., Tapper, A.R., 2013. Activation of  
807 GABAergic Neurons in the Interpeduncular Nucleus Triggers Physical Nicotine  
808 Withdrawal Symptoms. *Curr. Biol.* 23, 2327–2335.  
809 <https://doi.org/10.1016/j.cub.2013.09.041>

810 Zhao, H., Zhang, B.-L., Yang, S.-J., Rusak, B., 2015. The role of lateral habenula–  
811 dorsal raphe nucleus circuits in higher brain functions and psychiatric illness.  
812 *Behav. Brain Res.* 277, 89–98. <https://doi.org/10.1016/j.bbr.2014.09.016>

813 Zhou, L., Liu, M.-Z., Li, Q., Deng, J., Mu, D., Sun, Y.-G., 2017. Organization of  
814 Functional Long-Range Circuits Controlling the Activity of Serotonergic Neurons in  
815 the Dorsal Raphe Nucleus. *Cell Rep.* 18, 3018–3032.  
816 <https://doi.org/10.1016/j.celrep.2017.02.077>

817 Zilionis, R., Nainys, J., Veres, A., Savova, V., Zemmour, D., Klein, A.M., Mazutis, L.,  
818 2017. Single-cell barcoding and sequencing using droplet microfluidics. *Nat.*  
819 *Protoc.* 12, 44–73. <https://doi.org/10.1038/nprot.2016.154>

820 Zuo, W., Xiao, C., Gao, M., Hopf, F.W., Krnjević, K., McIntosh, J.M., Fu, R., Wu, J.,  
821 Bekker, A., Ye, J.-H., 2016. Nicotine regulates activity of lateral habenula neurons  
822 via presynaptic and postsynaptic mechanisms. *Sci. Rep.* 6, 32937.  
823 <https://doi.org/10.1038/srep32937>

824  
825  
826  
827  
828  
829  
830  
831  
832  
833  
834



835 **FIGURE LEGENDS**

836 **Figure 1: High-throughput single cell transcriptomic profiling of the habenula.**

837 **(A)** Schematic for scRNA-seq using the inDrop platform. Tissue containing the habenula  
838 was microdissected from acute coronal brain slices prepared from adult mice (1). Tissue  
839 chunks were digested in a cocktail of proteases and followed by trituration and filtration  
840 to obtain a cell suspension (2). Single cells were encapsulated using a droplet-based  
841 microfluidic device (3) for cell barcoding and mRNA capture (4). RNA sequencing (5)  
842 and bioinformatics analysis followed (6). **(B)** t-SNE plot of the processed dataset  
843 containing 7,506 cells from 6 animals. Cells are color-coded according to the cluster  
844 labels shown in (C). **(C)** Left: Dendrogram with cell class labels corresponding to  
845 clusters shown in (B). Right: Dot plot displaying expression of example enriched genes  
846 used to identify each major cell class. The color of each dot (blue to red) indicates the  
847 relative log-scaled expression of each gene whereas the dot size indicates the fraction  
848 of cells expressing the gene.

849 **Figure 2: MHb neuron subtypes can be distinguished transcriptionally.**

850 **(A)** Location of MHb and ISH of *Tac2* expression from the Allen Institute Database.  
851 *Tac2* expression is restricted to cells in the MHb in this region. **(B)** *Tac2* serves as an  
852 excellent marker for MHb neurons in the dataset of SCTs (Scale on right shows  
853 normalized (log) gene expression.) **(C)** Sample ISH images from the Allen Institute  
854 Database showing selected differentially expressed genes for distinct transcriptionally  
855 defined neuronal subtypes in MHb. **(D)** Left: Dendrogram with MHb subtype labels  
856 corresponding to clusters shown in (Figure S2C). Right: Heatmap showing the relative  
857 expression (mean z- scored) of selected genes that are enriched in each MHb neuron  
858 subtype. Spatial distributions of enriched genes highlighted in (C) are labeled in red.



859 **Figure 3: Characterization of genes differentially expressed between LHb neuron**  
860 **subtypes.**

861 **(A)** Location of LHb clusters and ISH *Gap43* expression from the Allen Institute  
862 Database. *Gap43* is highly expressed in neurons of the LHb and surrounding thalamus  
863 in this region, but excluded from MHb neurons. **(B)** *Gap43* serves as an excellent  
864 marker for LHb neurons in the dataset of single cell transcriptomes (Scale on right  
865 shows normalized (log) gene expression.) **(C)** Left: Illustration showing patterns of gene  
866 expression observed for genes shown for sample ISH to the right. Right: Sample ISH  
867 images from the Allen Institute Database showing selected differentially expressed  
868 genes for distinct transcriptionally defined neuronal subtypes in LHb. **(D)** Left:  
869 Dendrogram with LHb neuron labels corresponding spatial locations of differentially  
870 expressed genes within the LHb. Right: Heatmap showing the relative expression of  
871 selected genes that are enriched in each LHb neuron subtype. Spatial distributions of  
872 enriched genes highlighted in (C) are labeled in red.

873 **Figure 4: FISH confirms that differentially expressed genes from LHb subclusters**  
874 **are nonoverlapping and confined to specific spatial locations of LHb.**

875 **(A)** Left: Sample FISH of two differentially expressed LHb genes (*Vgf* (yellow) and  
876 *Chrm3* (magenta)), with distinct spatial profiles (LHb outlined with gray dashed line).  
877 Right: Quantification of fluorescence coverage of single cells for FISH of *Vgf* and *Chrm3*  
878 in LHb neurons (n= 444 cells, 3 mice). **(B)** Left: Sample FISH of two differentially  
879 expressed LHb genes (*Sst* (yellow) and *Chrm3* (magenta)), with distinct spatial profiles.  
880 Right: Quantification of fluorescence coverage of single cells for FISH of *Sst* and *Chrm3*  
881 in LHb neurons (n= 252 cells, 3 mice). **(C)** Sample FISH of two differentially expressed

882 Lhb genes (*Gpr151* (yellow) and *Chrm3* (magenta)), with distinct spatial profiles  
883 (illustrated in upper right inset), Lhb outlined in gray dashed line. **(F)** Quantification of  
884 fluorescence coverage of single cells for FISH of *Gpr151* and *Chrm3* in Lhb neurons  
885 (n= 240 cells, 3 mice). **(D)** Left: Sample FISH of two differentially expressed Lhb genes  
886 (*Sst* (yellow) and *Gpr151* (magenta)), with distinct spatial profiles. Right: Quantification  
887 of fluorescence coverage of single cells for FISH of *Sst* and *Gpr151* in Lhb neurons (n=  
888 112 cells, 3 mice).

889 **Figure 5: Distinct Lhb neuron subtypes prefer different downstream targets, but**  
890 **all subtypes target both VTA and DRN.**

891 **(A)** Location of sites for AAV helper viruses (AAV-FLEX-TVA-mCh and AAV-FLEX-  
892 RVG) and pseudotyped rabies virus (EnvA-RbV-GFP) injection into VTA. **(B)** Location  
893 of non-pseudotyped rabies virus (RbV-GFP) injection into DRN. **(C)** Sample habenula  
894 FISH images for *RbV-N* and *Chrm3* following viral injection into either VTA or DRN. **(D)**  
895 Quantification of the proportion of *RbV-N* labeled neurons that overlapped with the  
896 enriched genes for distinct Lhb neuron subtypes (VGAT-IRES-Cre n= 1430 cells/ 4  
897 mice, DAT-IRES-Cre n= 549/ 3 mice, DRN n= 465/ 3 mice). Filled rectangles are the  
898 mean and error bars are  $\pm$ SEM, see Table 6 for statistical comparisons.

899

900

901

902

903

904

905 **SUPPLEMENTARY INFORMATION**

906 **Figure S1 (related to Figure 1): Comparison of cell type composition across**  
907 **hemispheres and gene diversity, mitochondrial genes, and UMIs across cell**  
908 **types.**

909 **(A)** t-SNE plot of the dataset with cells color-coded by the hemisphere from which the  
910 sample was acquired. **(B)** Bar plots showing the percentage of cells in each  
911 hemisphere that are categorized into each of the 12 major cell types. **(C)** Violin plots of  
912 the number of genes (top), unique molecular identifiers (UMIs, middle), and percentage  
913 of mitochondrial genes (bottom) for each of the 12 cell types. Each point represents a  
914 single cell and filled area is a probability distribution of all the cells in that category.

915

916 **Figure S2 (related to Figure 2): Subclustering of MHb neurons before and after**  
917 **subtraction of heterogeneity introduced by elevated expression of activity**  
918 **dependent genes (ADGs).**

919 **(A)** t-SNE plot of subclustered MHb neurons extracted from cells in Figure 1B. **(B)** t-  
920 SNE plot showing three clusters of cells (top) that expressed elevated levels of several  
921 ADGs (*Fos*, *Fosb*, *Egr1*, *Junb*, *Dusp18*, etc.). **(C)** t-SNE plot after regressing out the  
922 principle component (PC) that included many of the ADGs shown in (B). Cells from  
923 clusters that were high in ADG expression were now intermingled with clusters that we  
924 defined by the spatial location of their DEGs (See also Figure 2C and D). **(D)** t-SNE plot  
925 showing ADG score following regressing out of the PC containing ADGs. **(E)** All 12  
926 statistically significant PCs for the MHb neuron clusters shown above. PC number 4

927 (red) contained several ADGs. **(F)** The top 25 genes associated with PC4 (the ADG  
928 PC) contained several known ADGs highlighted in red.

929

930 **Figure S3 (related to Figure 2): Sample ISH images showing spatial distribution of**  
931 **selected differentially expressed genes in MHb. (A-J)** Sample ISH images from the  
932 Allen Institute Database showing selected differentially expressed genes for distinct  
933 transcriptionally defined neuronal subtypes in MHb. Gene name is in the upper right of  
934 each image and subregion where gene is enriched is on the left. Scale bar = 250 $\mu$ m.

935

936 **Figure S4 (related to Figure 2 and 3): Differentially expressed genes define**  
937 **distinct habenular subtypes.**

938 **(A)** Left: Dendrogram for subclustering of all neurons shown in Figure 2 and 3. Right:  
939 Dot plot displaying expression of example differentially expressed genes used to identify  
940 each subtype of habenula neuron. The color of each dot (blue to red) indicates the  
941 relative expression of each gene whereas the dot size indicates the fraction of cells  
942 expressing the gene. Only representative genes are shown for entire list of DEGs see  
943 Table 3 and 5.

944

945 **Figure S5 (related to Figure 5): Cells from all 4 LHb subtypes project to both the**  
946 **VTA and DRN.**

947 **(A)** Quantification of fluorescence coverage of single cells for FISH of selected enriched  
948 genes in LHb neurons that were positive for *RbV-N* following monosynaptic retrograde  
949 tracing from VGAT-IRES-Cre<sup>+</sup> neurons in the VTA (left: n= 521 cells, 4 mice; center: n=

950 742 cells, 4 mice; right: n= 167 cells, 2 mice). **(B)** Quantification of fluorescence  
951 coverage of single cells for FISH of selected enriched genes in LHb neurons that were  
952 positive for *RbV-N* following monosynaptic retrograde tracing from DAT-IRES-Cre+  
953 neurons in the VTA (left: n= 233 cells, 3 mice; center: n= 233 cells, 3 mice; right: n= 103  
954 cells, 3 mice). **(C)** Quantification of fluorescence coverage of single cells for FISH of  
955 selected enriched genes in LHb neurons that were positive for *RbV-N* following injection  
956 of RbV-GFP into the DRN (left: n= 163 cells, 3 mice; center: n= 133 cells, 3 mice; right:  
957 n= 169 cells, 3 mice).

958

959 **Figure S6 (related to Figure 5): Quantification and genetic characterization of VTA**  
960 **starter cells from monosynaptic retrograde tracing.**

961 **(A)** Left: Coronal section of injection site into VTA and starter cells location for Cre-  
962 dependent monosynaptic retrograde tracing experiments. Right: FISH for *RbV-N* to  
963 demonstrate the location of rabies infected cells in the VTA. **(B)** Left: Coronal section of  
964 injection site into DRN Cre-independent retrograde tracing experiments. Right: FISH for  
965 *RbV-N* to demonstrate the location of rabies infected cells in the DRN. **(C)** Left:  
966 Quantification of fluorescence coverage of single putative starter cells (*Cre+* and *RbV-*  
967 *N+*) for FISH of *Cre* and *Slc17a6* in VTA neurons of the VGAT-IRES-Cre animals (n=  
968 567 cells, 4 mice). Right: The proportion of putative starter cells that expressed  
969 *Slc17a6*. There is a subset of VGAT-IRES-Cre+ neurons in the VTA that co-express  
970 *Slc17a6* (Root et al., 2014). **(D)** Left: Quantification of fluorescence coverage of single  
971 putative starter cells (*Slc6a3+* and *RbV-N+*) for FISH of *Slc6a3* and *Slc32a1* in VTA  
972 neurons of the DAT-IRES-Cre animals (n= 566 cells, 3 mice). Right: The proportion of

973 putative starter cells that expressed *Slc32a1*. **(E)** Negative control for EnvA  
974 pseudotyping of the rabies virus (EnvA-RbV-GFP) showing a coronal section following  
975 injection of EnvA-RbV-GFP into the VTA without prior infection by AAV-TVA-mCh.  
976 Without co injecting AAV-TVA-mCh, EnvA-RbV-GFP cannot infect neurons, thus no  
977 GFP expression. Filled rectangles represent the mean and error bars are  $\pm$ SEM.

978 **Figure S7 (related to Figure 2, 3, and 4): A map of habenula subregions based on**  
979 **single cell transcriptomic profiling.**

980 **(A)** Habenular subregions are outlined in black, MHb subregions are green and LHb  
981 subregions are magenta. The location of borders is a rough estimate of a boundary  
982 between transcriptionally defined neuronal subtypes and previous literature.





A

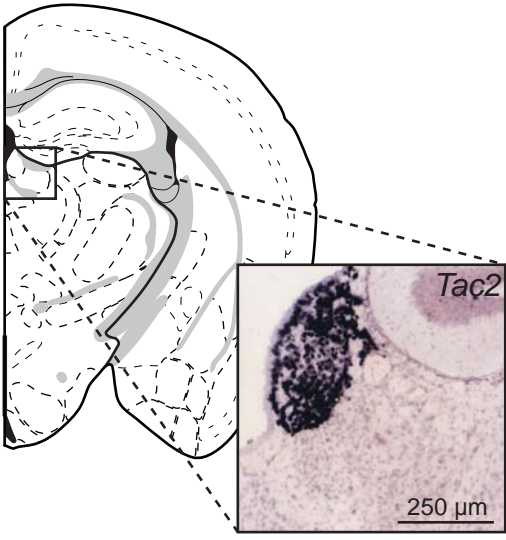

B

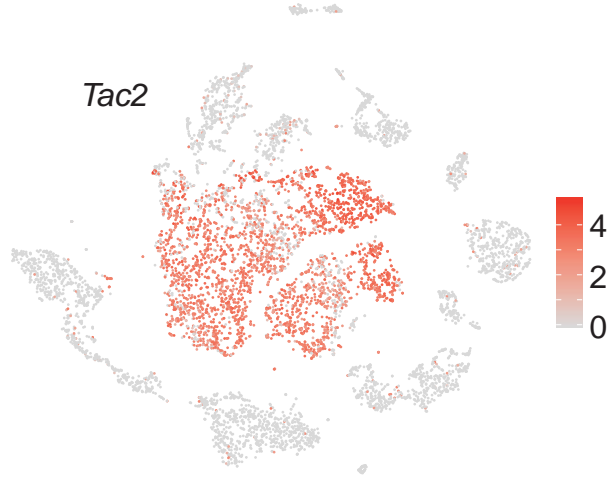

C

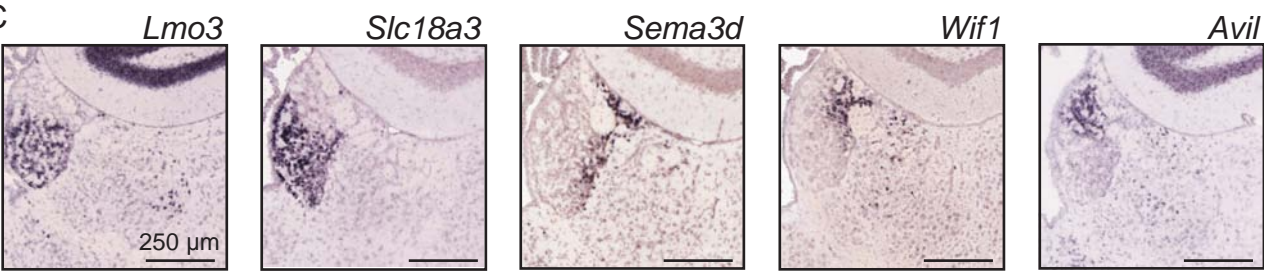

D

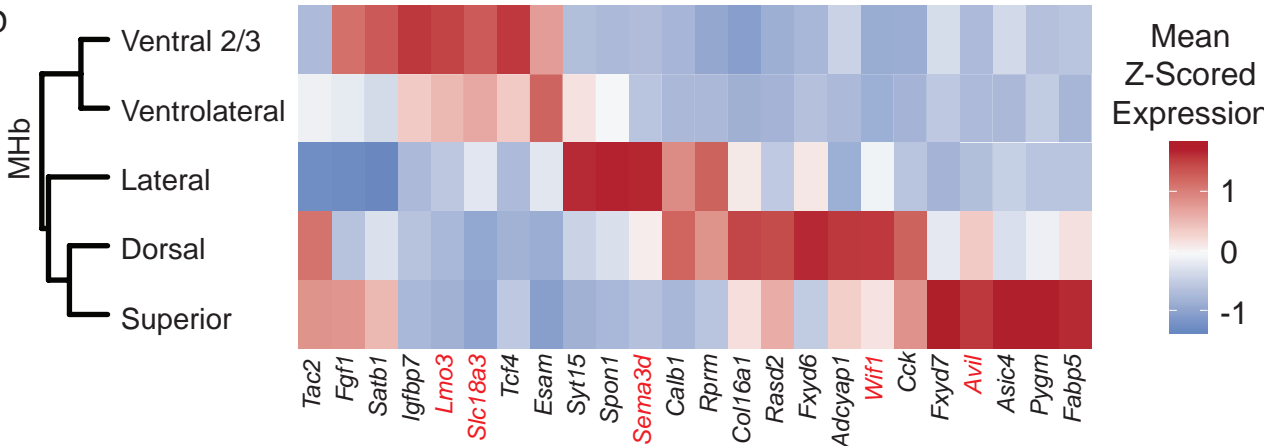

A

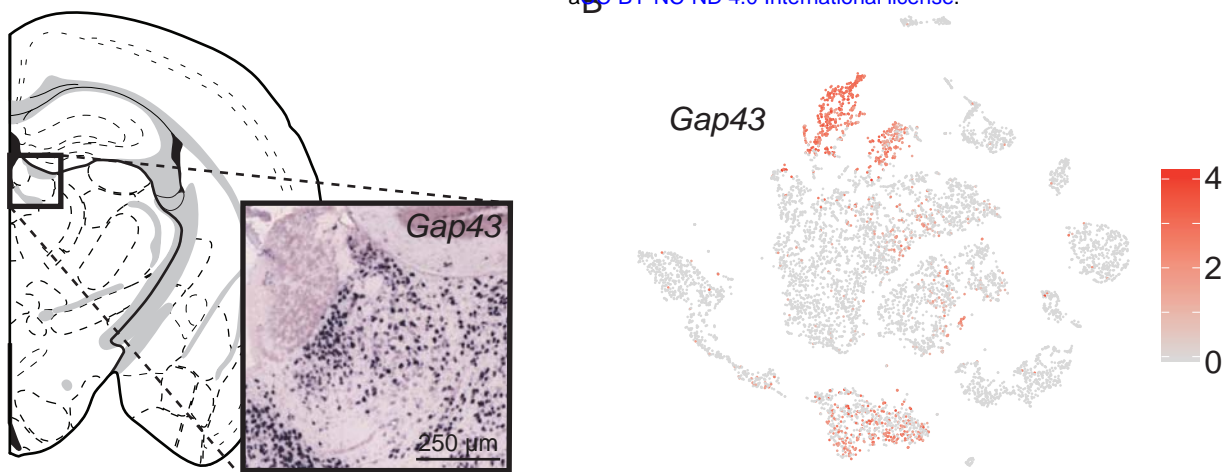

C

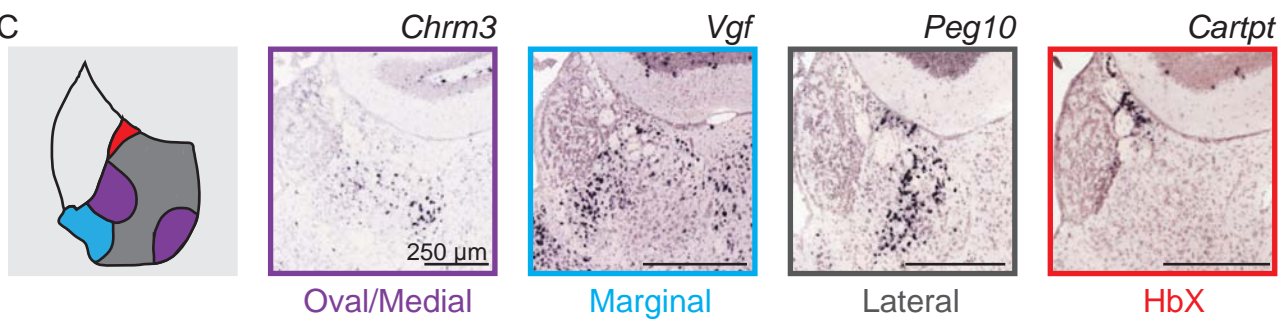

D

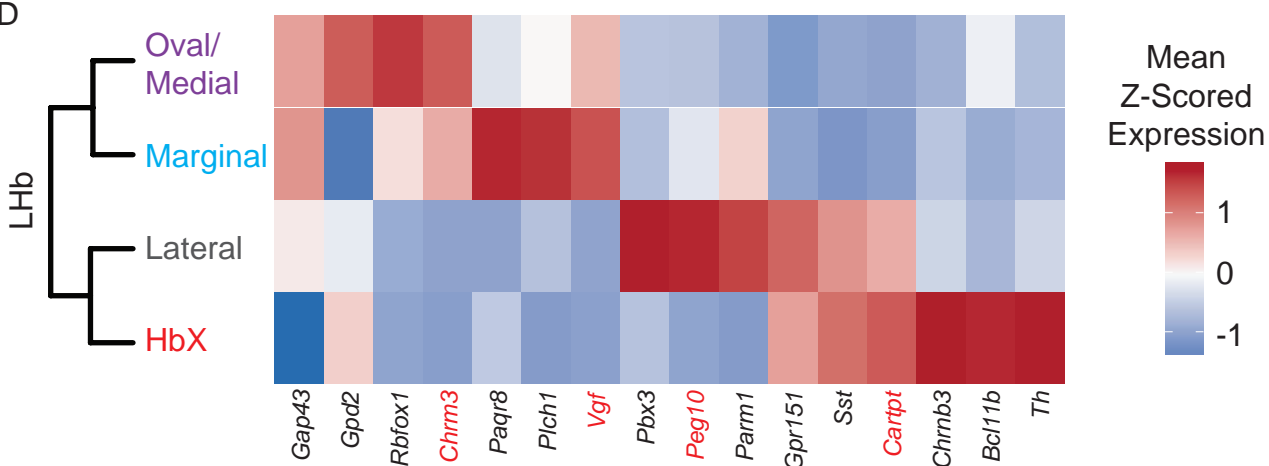

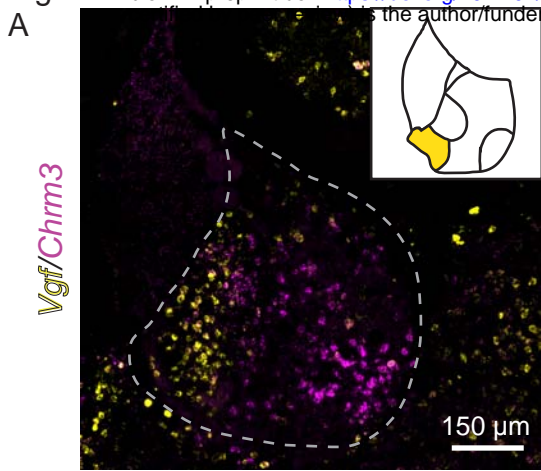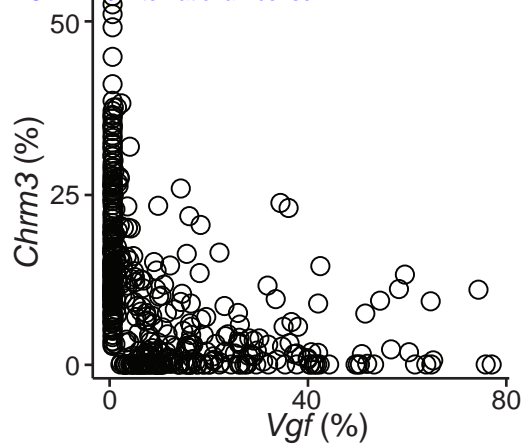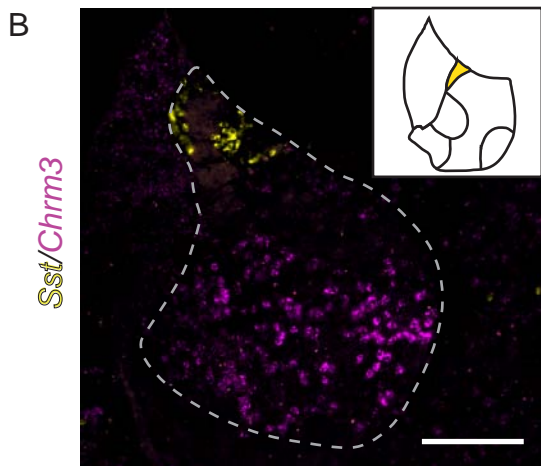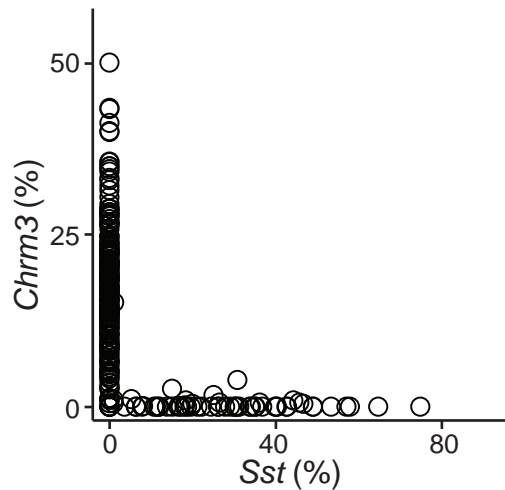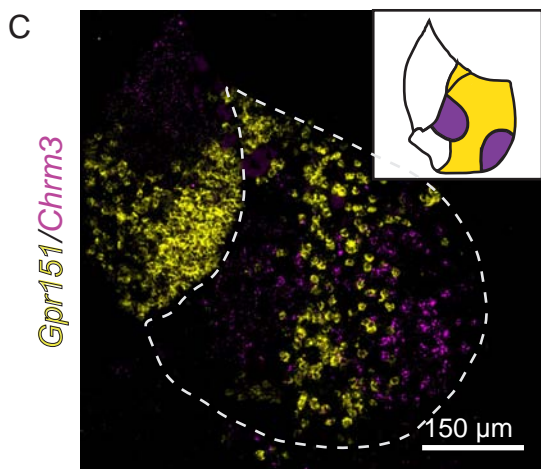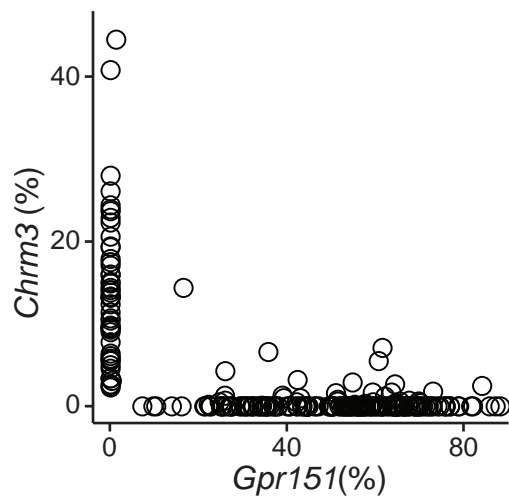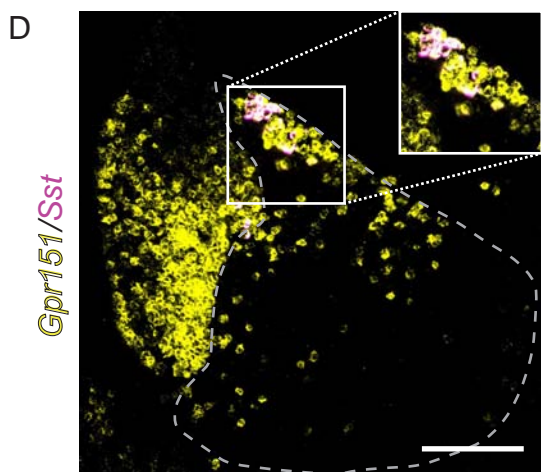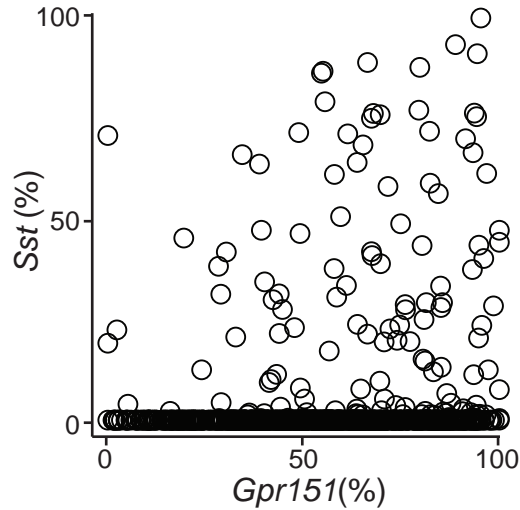

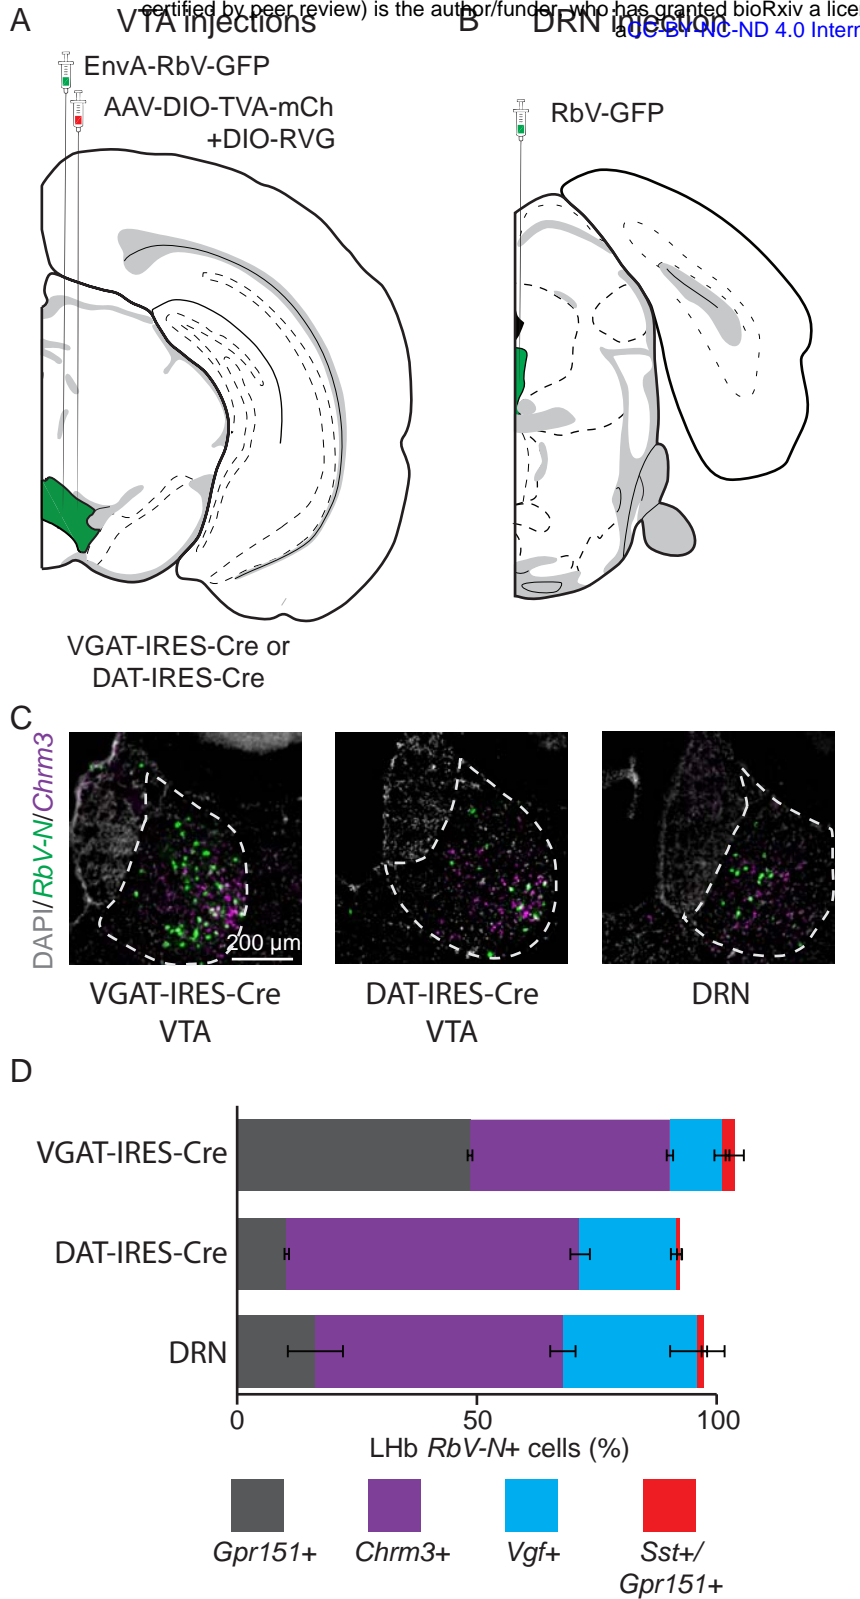

Source: https://www.biorxiv.org/content/10.1101/743401v1.full.pdf
